# Supplementary material for: The Effect of Floor Height on Secondhand Smoke Transfer in Multiunit Housing
Source: MDPI journal article supplement (doi:10.3390/ijerph19073794), 2022-03-23
Supplement: s1 [file s1]

| Table S1. Descriptive Statistics<br>Nicotine Concentration, 21 Low-Income High-Rise Buildings – Aggregated by Season |     |              |               |         |
|----------------------------------------------------------------------------------------------------------------------|-----|--------------|---------------|---------|
| Apartments                                                                                                           |     |              |               |         |
|                                                                                                                      | N   | M (SD) or %  | 95% CI        | p-value |
| <b>Floor <math>\leq</math> 7</b>                                                                                     | 199 |              |               |         |
| Geometric Mean                                                                                                       |     | 0.023 (2.29) | [0.020-0.025] | 0.308   |
| % above LOD                                                                                                          |     | 15.1         |               | 0.146   |
| <b>Floor 8-14</b>                                                                                                    | 281 |              |               |         |
| Geometric Mean                                                                                                       |     | 0.023 (2.17) | [0.021-0.026] |         |
| % above LOD                                                                                                          |     | 17.1         |               |         |
| <b>Floor <math>\geq</math> 15</b>                                                                                    | 386 |              |               |         |
| Geometric Mean                                                                                                       |     | 0.025 (2.27) | [0.023-0.027] |         |
| % above LOD                                                                                                          |     | 21.2         |               |         |
| Stairwells                                                                                                           |     |              |               |         |
|                                                                                                                      | N   | M (SD) or %  | 95% CI        | p-value |
| <b>Floor <math>\leq</math> 7</b>                                                                                     | 21  |              |               |         |
| Geometric Mean                                                                                                       |     | 0.15 (4.53)  | [0.07-0.29]   | 0.003   |
| % above LOD                                                                                                          |     | 76.2         |               | 0.031   |
| <b>Floor 8-14</b>                                                                                                    | 75  |              |               |         |
| Geometric Mean                                                                                                       |     | 0.23 (4.85)  | [0.16-0.33]   |         |
| % above LOD                                                                                                          |     | 82.7         |               |         |
| <b>Floor <math>\geq</math> 15</b>                                                                                    | 62  |              |               |         |
| Geometric Mean                                                                                                       |     | 0.45 (3.30)  | [0.33-0.60]   |         |
| % above LOD                                                                                                          |     | 95.2         |               |         |
| Hallways                                                                                                             |     |              |               |         |
|                                                                                                                      | N   | M (SD) or %  | 95% CI        | p-value |
| <b>Floor <math>\leq</math> 7</b>                                                                                     | 46  |              |               |         |
| Geometric Mean                                                                                                       |     | 0.18 (4.98)  | [0.11-0.28]   | 0.962   |
| % above LOD                                                                                                          |     | 78.3         |               | 0.643   |
| <b>Floor 8-14</b>                                                                                                    | 68  |              |               |         |
| Geometric Mean                                                                                                       |     | 0.16 (4.18)  | [0.12-0.23]   |         |
| % above LOD                                                                                                          |     | 77.9         |               |         |
| <b>Floor <math>\geq</math> 15</b>                                                                                    | 60  |              |               |         |
| Geometric Mean                                                                                                       |     | 0.16 (5.58)  | [0.11-0.26]   |         |
| % above LOD                                                                                                          |     | 71.7         |               |         |
